# Supplementary material for: Cross-Disorder Genomics Data Analysis Elucidates a Shared Genetic Basis Between Major Depression and Osteoarthritis Pain
Source: Front Genet. 2021 Sep 16;12:687687. doi: 10.3389/fgene.2021.687687 (PMC8481820; doi:10.3389/fgene.2021.687687)
Supplement: Supplementary file 3 [file Table_2.XLSX]

## Sheet: Table S2
Table S2. Genomic risk loci and lead SNPs identified by FUMA
Information about FUMA-identified genomic risk loci, including chromosome, position, p-value, and number and names of independent significant SNPs.
Genomic Locus	uniqID	rsID	Chromosome	Position	P-value	# Independent Significant SNPs	Individual Significant SNPs
1	1:40151810:G:T	rs6690939	1	40151810	1.937e-08	1	rs6690939
2	1:67053994:A:C	rs72676198	1	67053994	1.76e-09	1	rs72676198
3	1:72940273:A:G	rs10789340	1	72940273	3.103e-15	6	rs10789340;rs782212;rs61771930;rs2126077;rs12740789;rs7531118
3	1:73446245:A:G	rs4233093	1	73446245	4.882e-09	3	rs4233093;rs7523829;rs61765555
4	1:103466053:C:T	rs2622873	1	103466053	8.496e-09	1	rs2622873
5	1:117873022:C:G	rs1774858	1	117873022	8.231e-10	1	rs1774858
6	2:22960181:A:G	rs13394164	2	22960181	2.91e-09	1	rs13394164
7	2:33461375:A:G	rs4630744	2	33461375	2.483e-09	2	rs4630744;rs2367624
8	2:50940168:C:T	rs858936	2	50940168	5.62e-09	1	rs858936
9	2:70712802:C:T	rs2862851	2	70712802	7.847e-09	1	rs2862851
10	2:104479862:A:T	rs1441102	2	104479862	8.3e-09	1	rs1441102
11	2:161356971:C:G	rs7564151	2	161356971	1.977e-08	1	rs7564151
12	2:204394236:C:T	rs2443798	2	204394236	1.254e-09	2	rs2443798;rs17406900
13	2:212590841:A:C	rs55897719	2	212590841	4.584e-09	2	rs55897719;rs72948529
14	3:49162583:C:T	rs35713889	3	49162583	3.986e-08	2	rs35713889;rs7617480
14	3:49621994:C:T	rs7629322	3	49621994	3.148e-12	7	rs7629322;rs9815930;rs9812936;rs2003485;rs3774749;rs11130182;rs7617480
15	3:117509984:C:T	rs6783233	3	117509984	1.288e-11	2	rs6783233;rs7428847
16	4:103188709:C:T	rs13107325	4	103188709	3.231e-15	4	rs13107325;rs34333163;rs34592089;rs6855246
17	4:121550203:C:T	rs34128197	4	121550203	9.331e-09	1	rs34128197
18	4:140956299:C:T	rs4863729	4	140956299	2.867e-08	1	rs4863729
19	5:104003311:C:G	rs191800971	5	104003311	8.009e-13	3	rs191800971;rs55649128;rs1363104
20	6:27412386:C:T	rs7772160	6	27412386	1.191e-08	1	rs7772160
21	6:28696772:G:T	rs150814685	6	28696772	7.955e-09	1	rs150814685
22	6:33806268:A:G	rs10947453	6	33806268	2.419e-08	1	rs10947453
23	6:66646738:C:T	rs76736233	6	66646738	1.885e-10	4	rs76736233;rs77976885;rs2214123;rs17644076
24	6:142976756:A:C	rs1334585	6	142976756	2.133e-09	1	rs1334585
25	6:147987135:C:T	rs9390489	6	147987135	1.062e-08	1	rs9390489
26	7:1866931:A:G	rs13234909	7	1866931	2.71e-08	2	rs13234909;rs34021847
26	7:2050747:C:T	rs56180486	7	2050747	2.95e-11	1	rs56180486
26	7:2121156:A:G	rs1558461	7	2121156	5.123e-11	2	rs1558461;rs34021847
27	7:12268798:C:T	rs5011438	7	12268798	9.201e-11	3	rs5011438;rs10235395;rs1865567
28	7:95711278:C:T	rs10228472	7	95711278	2.352e-10	2	rs10228472;rs756859
29	7:114047542:C:G	rs8180817	7	114047542	1.122e-11	2	rs8180817;rs4730633
30	9:11203149:A:G	rs1931388	9	11203149	2.165e-10	1	rs1931388
31	9:23737627:A:G	rs3793577	9	23737627	7.268e-10	1	rs3793577
32	9:36992369:A:T	rs10973158	9	36992369	1.884e-08	1	rs10973158
33	9:96213146:A:T	rs3815563	9	96213146	5.23e-09	1	rs3815563
34	9:116904534:C:T	rs2043195	9	116904534	1.849e-08	2	rs2043195;rs1017360
35	9:122662502:C:T	rs10465112	9	122662502	2.532e-08	1	rs10465112
36	10:106541900:A:G	rs731163	10	106541900	2.075e-08	1	rs731163
36	10:106610839:A:G	rs1021363	10	106610839	1.874e-10	2	rs1021363;rs11596214
37	11:28623873:G:T	rs7931440	11	28623873	6.879e-10	1	rs7931440
38	11:30825179:C:G	rs10488798	11	30825179	3.619e-09	2	rs10488798;rs7928522
39	11:47441513:A:G	rs10838708	11	47441513	2.561e-08	1	rs10838708
40	11:88477214:C:T	rs6483414	11	88477214	3.992e-08	1	rs6483414
41	11:113286829:C:T	rs2734837	11	113286829	2.567e-12	3	rs2734837;rs7934649;rs2186800
41	11:113451765:G:T	rs7940164	11	113451765	4.292e-09	1	rs7940164
42	12:24017343:C:T	rs78751285	12	24017343	5.514e-09	1	rs78751285
43	12:90319277:C:T	rs17192443	12	90319277	2.222e-08	1	rs17192443
44	12:94136009:C:G	rs7953280	12	94136009	1.363e-09	1	rs7953280
45	12:123760109:A:T	rs35067339	12	123760109	9.674e-10	1	rs35067339
46	13:53704246:A:G	rs2181389	13	53704246	1.921e-09	2	rs2181389;rs9596775
47	14:42100553:A:G	rs1983711	14	42100553	2.201e-11	3	rs1983711;rs712407;rs11628299
48	14:42539951:A:T	rs72672507	14	42539951	6.844e-09	1	rs72672507
49	14:104357988:C:G	rs111280186	14	104357988	7.188e-11	1	rs111280186
50	15:51749726:A:C	rs930920	15	51749726	1.853e-08	1	rs930920
51	16:60743834:A:C	rs1862743	16	60743834	3.581e-09	1	rs1862743
52	18:50737358:G:T	rs62100766	18	50737358	1.04e-08	1	rs62100766
53	18:53098732:A:G	rs7240481	18	53098732	9.248e-09	1	rs7240481
53	18:53198836:A:G	rs619466	18	53198836	1.851e-08	2	rs619466;rs896686
54	18:77578191:A:C	rs11663602	18	77578191	6.616e-09	3	rs11663602;rs7241572;rs516890
55	19:41833784:A:G	rs75621460	19	41833784	2.745e-09	1	rs75621460
56	21:46634146:C:T	rs2225434	21	46634146	4.975e-08	1	rs2225434
