# Supplementary material for: Cross-Disorder Genomics Data Analysis Elucidates a Shared Genetic Basis Between Major Depression and Osteoarthritis Pain
Source: Front Genet. 2021 Sep 16;12:687687. doi: 10.3389/fgene.2021.687687 (PMC8481820; doi:10.3389/fgene.2021.687687)
Supplement: Supplementary file 12 [file Table_11.XLSX]

## Sheet: Table S11
Table S11. Additional information about relevant drug-gene interactions
Drug-gene interaction information for 16 genes classified as osteoarthritis (OA), major depression (MD), shared, and mechanosensory. Table includes database sources, a full list of relevant drugs, their indications and associated conditions, and additional notes.
Gene	Category	Database	Drugs	Current Indication	Associated Conditions	Additional Notes
CD40	MD	TTD	ANTI-CD40-XTEN, BI 655064, CFZ533	Rheumatoid arthritis (investigative, phase 1, phase 2), myasthenia gravis (phase 2)	Rheumatoid arthritis, myasthenia gravis
NRG1	MD	TTD	Aspirin, Bupivacaine, Colchicine	Antiplatelet and analgesic, local anaesthetic, gouty arthritis	OA, acute gouty arthritis, psoriatic arthritis, rheumatoid arthritis
GRM5	MD	DrugBank, TTD	AZD2066, AZD2516, LY467711, LY525327, Rufinamide	Chronic neuropathic pain (discontinued in phase 2, terminated), migraine (terminated), anticonvulsant	Chronic neuropathic pain, migraine
NR3C1	MD	DGIdb, DrugBank, TTD	AZD9567, Dexamethasone, NCX-1015, PF-251802, Triamcinolone, VBP15	Rheumatoid arthritis (phase 1, discontinued in phase 1), corticosteroid, glucocorticoid, inflammatory bowel disease (phase 1), Duchenne dystrophy (phase 2)	Post-traumatic OA, gouty arthritis, rheumatoid arthritis, psoriatic arthritis, inflammatory bowel disease, Duchenne dystrophy
TAOK3	MD	PharmGKB	Morphine, opioids	Pain	Pain
TYR	MD	TTD	Rosmarinic acid	Rheumatoid arthritis (investigative)	Rheumatoid arthritis
HTT	Mechanosensory	DGIdb, PharmGKB, TTD	Risperidone, methylphenidate	Schizophrenia, bipolar I disorder, irritability associated with ASD, MDD (investigative), aggression/psychotic symptoms in Alzheimer's, alcoholism (investigative), GAD (investigative), PTSD (investigative), anorexia nervosa (investigative), borderline personality disorder (BPD) (investigative), Tourette's syndrome (investigative), OCD (investigative), mood stabilizer, ADHD (investigative), narcol…	Schizophrenia, bipolar I disorder, ASD, MDD, Alzheimer's disease, alcoholism, GAD, PTSD, anorexia nervosa, borderline personality disorder (BPD), Tourette's syndrome, OCD, ADHD, narcolepsy
CRHR1	OA	DGIdb, TTD, PharmGKB, STITCH	Antalarmin, BMS-561388, CP-154,526, Cp-316311, CRA 1000, DES-ARG(9)-[LEU(8)]-BK, DMP-695/696, DMP-696, Emicerfont, Fluoxetine, GSK561679, GSK586529, NBI-37582, ONO-2333MS, Pexacerfont, SSR125543, SSRIs & SNRIs, Telavancin, Verucerfont	MDD (approved, investigative, phase 1, discontinued in phase 2, phase 2, terminated), drug addiction (under development), anxiety disorder (investigative, preclinical, phase 1, phase 2, terminated), alcoholism (investigative, phase 2), mood disorder (discontinued in phase 2), social anxiety disorder, irritable bowel syndrome	MDD, drug addiction, anxiety disorder, alcoholism, mood disorder, social anxiety disorder, irritable bowel syndrome	KEGG pathways: long-term depression, neuroactive ligand-receptor interaction (associated with alcohol dependence)
CYP1A2	OA	PharmGKB	Antipsychotics, Clozapine, Escitalopram, Paroxetine	Schizophrenia, MDD, anxiety (GAD), OCD, PTSD, social anxiety disorder (SAD), panic disorders, irritable bowel syndrome	Schizophrenia, MDD, anxiety (GAD), OCD, PTSD, social anxiety disorder (SAD), panic disorders, irritable bowel syndrome
TGFB1	OA	DGIdb	Atenolol	Migraine (off-label), management of alcohol withdrawal (off-label)	Alcohol withdrawal syndrome (AWS), migraine
IL11	OA	PharmGKB, DGIdb	Citalopram, Escitalopram	MDD, anxiety (GAD), symptomatic relief of OCD	MDD, anxiety (GAD), OCD
ITIH3	OA	PharmGKB	Clozapine	Schizophrenia, bipolar I disorder, irritability associated with ASD, MDD (investigative), ADHD (investigative), aggression/psychotic symptoms in Alzheimer's, alcoholism (investigative), GAD (investigative), PTSD (investigative), anorexia nervosa (investigative), borderline personality disorder (BPD) (investigative), Tourette's syndrome (investigative), OCD (investigative), mood stabilizer	Schizophrenia, bipolar I disorder, ASD, MDD, ADHD, Alzheimer's disease, alcoholism, GAD, PTSD, anorexia nervosa, borderline personality disorder (BPD), Tourette's syndrome, OCD
SLC39A8	OA	PharmGKB	Ethanol	N/A	Alcoholism	Variant rs13135092 is associated with risk of developing alcoholism
DPEP1	OA	STITCH	Glutamic acid	Schizophrenia, improves mental capacities, control of alcoholism	No relevant conditions
NRXN1	Shared, mechanosensory	DrugBank, PharmGKB	Antipsychotics, Duloxetine	MDD, GAD, schizophrenia, fibromyalgia, chronic musculoskeletal pain, OA of the knee, chronic lower back pain	MDD, GAD, schizophrenia, fibromyalgia, chronic muscoskeletal pain, OA of the knee, chronic lower back pain
DRD2	Shared, OA, MD, mechanosensory	DGIdb, DrugBank, STITCH, TTD	Aripiprazole, Bicifadine, Bromocriptine, CGP-25454A, Clozapine, CLR-3001, Dihydroergotamine, DSP-1200, Ergotamine, Fencamfamine, Haloperidol, Lamotrigine, Loxapine, Morphine, Olanzapine, Paliperidone, Perphenazine, Pimozide, Propiomazine, Risperidone, Rolicyclidine, RP5063 (Brilaroxazine), S32504, SKL-10406, Spiperone, Tiapride	MDD (approved, phase 1, phase 2, terminated), treatment-resistant depression, depressive fatigue, schizophrenia, acute psychosis, bipolar I disorder, alcohol withdrawal, irritability associated with ASD, ADHD, Tourette's syndrome, Parkinson's disease (approved, preclinical), Alzheimer's disease, analgesic, migraine, neuropathic pain, dissociative anaesthetic, anticonvulsant, antihistamine	MDD, suicidal behavior, anxiety, PTSD, OCD, severe disruptive behavior disorder, schizophrenia, acute psychosis, schizoaffective disorders, bipolar I disorder, alcohol withdrawal, ASD, ADHD, Tourette's syndrome, Parkinson's disease, Alzheimer's disease, clinical trials for OA, migraine, neuropathic pain	KEGG pathways: neuroactive ligand-receptor interaction, cocaine addiction, alcoholism; WikiPathways: hypothetical network for drug addiction; genes and (common) pathways underlying drug addiction; CNS stimulant
